# Supplementary material for: Getting to Hope: Perspectives from Patients and Caregivers Living with Chronic Childhood Illness
Source: MDPI journal article supplement (doi:10.3390/children8060525), 2021-06-19
Supplement: s1 [file s1]

## Supplementary Materials

**Table S1.** Promotors and inhibitors of hope generated by patients and caregivers.

| STRUCTURAL LEVEL<br>Domain   | Promotors                                                                                                                                                                                                                                                                                                                                                                                                                                                                                                                                                                                                                                                                                                                                                                                                                                                                                                                                                                                                                                     | Inhibitors                                                                                                                                                                                                                                                                                                                                                                                                                                                                                                                                                                                                                                                                                                                                                                                                                                 |
|------------------------------|-----------------------------------------------------------------------------------------------------------------------------------------------------------------------------------------------------------------------------------------------------------------------------------------------------------------------------------------------------------------------------------------------------------------------------------------------------------------------------------------------------------------------------------------------------------------------------------------------------------------------------------------------------------------------------------------------------------------------------------------------------------------------------------------------------------------------------------------------------------------------------------------------------------------------------------------------------------------------------------------------------------------------------------------------|--------------------------------------------------------------------------------------------------------------------------------------------------------------------------------------------------------------------------------------------------------------------------------------------------------------------------------------------------------------------------------------------------------------------------------------------------------------------------------------------------------------------------------------------------------------------------------------------------------------------------------------------------------------------------------------------------------------------------------------------------------------------------------------------------------------------------------------------|
| Healthcare research          | <ul style="list-style-type: none"> <li>• Access to research, knowledge/awareness of research for improving healthcare</li> <li>• Knowledge/awareness/pursuit of research going on to improve the healthcare system</li> <li>• Access to clinical trials</li> <li>• Research related to illness</li> </ul>                                                                                                                                                                                                                                                                                                                                                                                                                                                                                                                                                                                                                                                                                                                                     |                                                                                                                                                                                                                                                                                                                                                                                                                                                                                                                                                                                                                                                                                                                                                                                                                                            |
| Healthcare finance           | <ul style="list-style-type: none"> <li>• Access to all medications and services, regardless of insurance</li> <li>• Medical care for all; no insurance issues</li> </ul>                                                                                                                                                                                                                                                                                                                                                                                                                                                                                                                                                                                                                                                                                                                                                                                                                                                                      | <ul style="list-style-type: none"> <li>• Financial barriers; financial burden of ongoing medical bills*</li> </ul>                                                                                                                                                                                                                                                                                                                                                                                                                                                                                                                                                                                                                                                                                                                         |
| Healthcare delivery          | <ul style="list-style-type: none"> <li>• Confidence in medical team that supports us*</li> <li>• More integrated, holistic, alternative medical approaches*</li> <li>• More mental health and emotional support*</li> <li>• Better transition from child to adult care*</li> <li>• Second opinions or options beyond medical care</li> <li>• Transition care</li> <li>• More support/follow up at home</li> <li>• Easier access/connection with providers (accessibility) support</li> <li>• Trust based patient/doctor relationship</li> <li>• More meaningful communication between medical teams</li> <li>• Access to social workers</li> <li>• Simplified questionnaires/assessments</li> <li>• More patient involvement in care</li> <li>• more involvement from patient with doctors/parents</li> <li>• Joy within the clinical setting (therapy animals, role model visits)</li> <li>• navigating healthcare system/patient navigator</li> <li>• better laws/policies to support communication between patients and doctors</li> </ul> | <ul style="list-style-type: none"> <li>• Not being heard by providers; lack of faith, empathy, sensitivity, compassion, and attitude from doctors; being dismissed (provider)*</li> <li>• Difficulty managing logistics (insurance, appointments, prescriptions)</li> <li>• Feeling your care is lacking, not giving you everything you need (e.g., Struggling to get a port)</li> <li>• When others don't listen to you/your needs (provider)</li> <li>• Words people use (provider)</li> <li>• Lack of sensitivity, compassion, mindfulness, around privacy (provider)</li> <li>• Lack of communication between providers</li> <li>• negative/neutral delivery of news from doctors (provider)</li> <li>• Delays in diagnosis</li> <li>• Broken health system</li> <li>• Language and cultural barriers for access to service</li> </ul> |
| <b>INTERPERSONAL LEVEL</b>   |                                                                                                                                                                                                                                                                                                                                                                                                                                                                                                                                                                                                                                                                                                                                                                                                                                                                                                                                                                                                                                               |                                                                                                                                                                                                                                                                                                                                                                                                                                                                                                                                                                                                                                                                                                                                                                                                                                            |
| Community & human connection | <ul style="list-style-type: none"> <li>• Being a person outside the disease*</li> <li>• Community service (giving back)</li> <li>• Community/human connection outside illness community</li> <li>• Community/connection inside chronic illness community</li> <li>• Get support from others (peer support)</li> <li>• Sharing stories, hearing positive patient stories</li> <li>• Connecting with friends (in/out of hospital)</li> <li>• Helping family around the house</li> <li>• Getting involved (advocacy)</li> <li>• Getting involved in politics</li> <li>• Enjoyable activities (retail therapy, being outdoors, games, food/wine tours, pets, nails/hair done)</li> <li>• Camps related to illness</li> <li>• Mentorship programs; having a mentor</li> <li>• Positive patient stories</li> <li>• Hope role models</li> <li>• Family based activities</li> </ul>                                                                                                                                                                   | <ul style="list-style-type: none"> <li>• Not having connection to advocates</li> <li>• Isolation</li> <li>• Lack of socialization</li> <li>• Stigmatization</li> </ul>                                                                                                                                                                                                                                                                                                                                                                                                                                                                                                                                                                                                                                                                     |
| Practical support            | <ul style="list-style-type: none"> <li>• Having resources that give us more time to do 'stress-relieving' activities</li> </ul>                                                                                                                                                                                                                                                                                                                                                                                                                                                                                                                                                                                                                                                                                                                                                                                                                                                                                                               |                                                                                                                                                                                                                                                                                                                                                                                                                                                                                                                                                                                                                                                                                                                                                                                                                                            |

|                                       |                                                                                                                                                                                                                                                                                                                                                                                                                                                                                                                                                     |                                                                                                                                                          |
|---------------------------------------|-----------------------------------------------------------------------------------------------------------------------------------------------------------------------------------------------------------------------------------------------------------------------------------------------------------------------------------------------------------------------------------------------------------------------------------------------------------------------------------------------------------------------------------------------------|----------------------------------------------------------------------------------------------------------------------------------------------------------|
|                                       | <ul style="list-style-type: none"> <li>• Get help with logistics of care to allow time for enjoyable activities</li> <li>• Respite services (e.g., various home help- errands, cleaning etc.)</li> <li>• Help from schools (support services)</li> </ul>                                                                                                                                                                                                                                                                                            |                                                                                                                                                          |
| <b>INTRAPERSONAL LEVEL</b>            |                                                                                                                                                                                                                                                                                                                                                                                                                                                                                                                                                     |                                                                                                                                                          |
| Spirituality                          | <ul style="list-style-type: none"> <li>• Spirituality and access to spirituality-based resources</li> <li>• Faith/ Daily prayers</li> </ul>                                                                                                                                                                                                                                                                                                                                                                                                         |                                                                                                                                                          |
| Self-development & Knowledge          | <ul style="list-style-type: none"> <li>• Taking a leadership or mentoring role yourself</li> <li>• Identifying goals and specific aspirations</li> <li>• Aspirations for the future</li> <li>• Get more information (consult resources)</li> <li>• Knowledge</li> <li>• Self-care</li> <li>• Unburying interests</li> <li>• Art, music &amp; other creative activities</li> <li>• Traveling</li> <li>• Planning for the future (e.g., job, travel)</li> </ul>                                                                                       | <ul style="list-style-type: none"> <li>• Lack of access to information or knowledge</li> </ul>                                                           |
| Psychologic wellness & emotional work | <ul style="list-style-type: none"> <li>• Acceptance</li> <li>• Acceptance of new normal</li> <li>• Validation/acknowledgement of feelings and situation</li> <li>• Willingness to be vulnerable</li> <li>• Getting support from a professional (e.g., therapist, SW, etc.)</li> <li>• Having a routine</li> <li>• Staying in the present moment/day</li> <li>• Bringing things to look forward to into hospital setting</li> <li>• Something to look forward to</li> <li>• Not aiming for perfection (e.g., accepting child as they are)</li> </ul> | <ul style="list-style-type: none"> <li>• Uncertainty about the future*</li> <li>• Feeling alone, fear, sadness, depression, and stress*</li> </ul>       |
| Physical wellness                     | <ul style="list-style-type: none"> <li>• Stress relievers (e.g., movement, anything that gets me in motion)</li> </ul>                                                                                                                                                                                                                                                                                                                                                                                                                              | <ul style="list-style-type: none"> <li>• Health setbacks</li> <li>• Harmful impacts of medications</li> <li>• Pain and other physical impacts</li> </ul> |

Items are separated according to level of influence (structural, interpersonal, intrapersonal) and domain. \* indicated promoters and inhibitors that were rated highly ( $\geq 6$  votes) for importance by patients and caregivers .
